# Supplementary material for: Mapping Challenging Mutations by Whole-Genome Sequencing
Source: PubMed Central journal article supplement (PMC4856081; doi:10.1534/g3.116.028316), 2016-03-04
Supplement: supp_g3.116.028316_FigureS1.pdf [file supp_g3.116.028316_FigureS1.pdf]

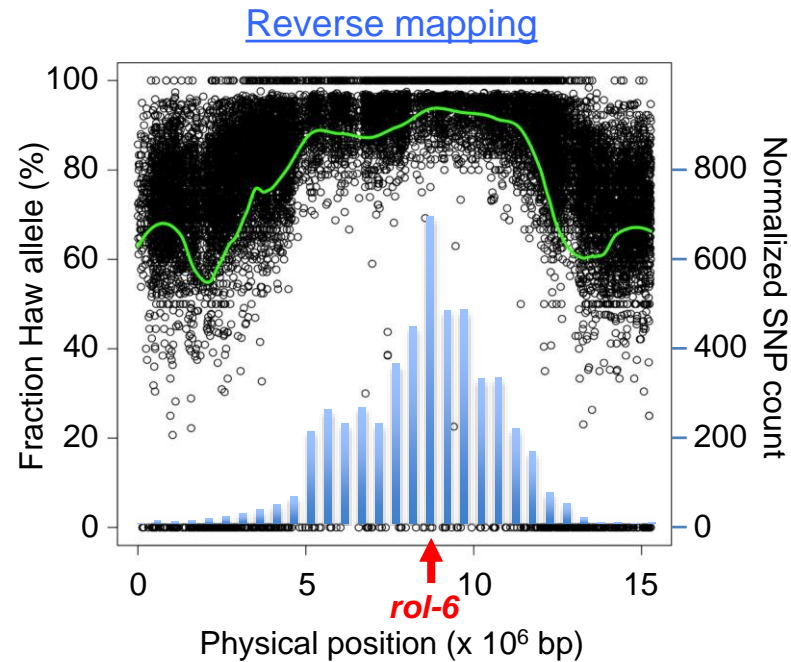

**Figure S1. Reverse mapping of dominant mutations.** Shown is the identical plot for Figure 2B, overlaid with a histogram (blue bars) of the normalized homozygous SNP count. The data were calculated in 0.5 Mb bins in the same manner as for CloudMap (Minevich *et al.*, 2012):  $[\text{number of homozygous SNPs} / (\text{number of total SNPs} - \text{number of homozygous SNPs})] \times \text{average number of total SNPs per bin, per chromosome}$ .
