# Supplementary material for: Mapping Challenging Mutations by Whole-Genome Sequencing
Source: PubMed Central journal article supplement (PMC4856081; doi:10.1534/g3.116.028316), 2016-03-04
Supplement: supp_g3.116.028316_TableS1.pdf [file supp_g3.116.028316_TableS1.pdf]

| <b>Table S1. Reagents for CRISPR-mediated gene editing.</b>                                                                                                                                                                                                                      |                                                                                                                                              |                               |
|----------------------------------------------------------------------------------------------------------------------------------------------------------------------------------------------------------------------------------------------------------------------------------|----------------------------------------------------------------------------------------------------------------------------------------------|-------------------------------|
| <b>Reagent</b>                                                                                                                                                                                                                                                                   | <b>Sequence (5'-3')</b>                                                                                                                      | <b>Concentration injected</b> |
| <i>Y51F10.10</i><br>crRNA                                                                                                                                                                                                                                                        | UUCAUCAAUGGAGCUUUUCCGUUUUAGAGCUAUG<br>CUGUUUUUG                                                                                              | 8 µg/mL                       |
| <i>Y51F10.10</i><br>repair DNA                                                                                                                                                                                                                                                   | ATTTTTACAGATTGAATACTACATGAAAGCATGCC<br>GAACAGTCGAAAAAA <u>T</u> CGGGAA <u>G</u> AGCTCCATTGAT<br>GAAACGTTGCCGTTCTTGATTCAATGCAATT <sup>1</sup> | 0.6 µg/mL                     |
| <i>dpy-10</i><br>crRNA                                                                                                                                                                                                                                                           | GCUACCAUAGGCACCACGAGGUUUUAGAGCUAUG<br>CUGUUUUUG                                                                                              | 8 µg/mL                       |
| <i>dpy-10</i><br>repair DNA                                                                                                                                                                                                                                                      | CACTTGAACCTCAATACGGCAAGATGAGAATGACT<br>GGAAACCGTACCGCATGCGGTGCCTATGGTAGCGGA<br>GCTT CACATGGCTTCAGACCAACAGCCTAT                               | 0.6 µg/mL                     |
| tracrRNA                                                                                                                                                                                                                                                                         | AACAGCAUAGCAAGUAAAAUAAGGCUAGUCCGU<br>UAUCAACUUGAAAAAGUGGCACCGAGUCGGUGCU<br>UUUUUU                                                            | 4 µg/mL                       |
| <sup>1</sup> Edits introduced into <i>Y51F10.10</i> by CRISPR are underlined and indicated in red; 'T' replaces 'C' and introduces the <i>hc85</i> mutation (Thr272Ile); 'G' replaces 'A' as a synonymous mutation that introduces a <i>SacI</i> restriction site for screening. |                                                                                                                                              |                               |
